# Supplementary material for: Biologically active dual functional zinc-doped biomass-derived carbon dots
Source: Royal Society of Chemistry journal article supplement (doi:10.1039/d4su00439f), 2024-01-01
Supplement: d4su00439f1.pdf [file d4su00439f1.pdf]

## Electronic Supplementary Information (ESI)

### Biologically Active Dual Functional Zinc-doped Biomass-Derived Carbon Dots

Mohammad Tariq<sup>1</sup>, Mo Ahamad Khan<sup>2†</sup>, Hammad Hasan<sup>1†</sup>, Sangeeta Yadav<sup>3†</sup>, Amaresh Kumar Sahoo<sup>3\*</sup> and Md Palashuddin Sk<sup>1\*</sup>

<sup>1</sup>Department of Chemistry, Aligarh Muslim University, Aligarh-202002, Uttar Pradesh, India.

<sup>2</sup>Department of Microbiology, Faculty of Medicine, Aligarh Muslim University, Aligarh-202002, Uttar Pradesh, India.

<sup>3</sup>Department of Applied Sciences, Indian Institute of Information Technology Allahabad (IIIT Allahabad), Prayagraj-211015, Uttar Pradesh, India.

<sup>†</sup>Authors equally contributed to this work

\*Corresponding author email: palashuddin.ch@amu.ac.in (M. P. Sk), asahoo@iiita.ac.in (A. K. Sahoo)

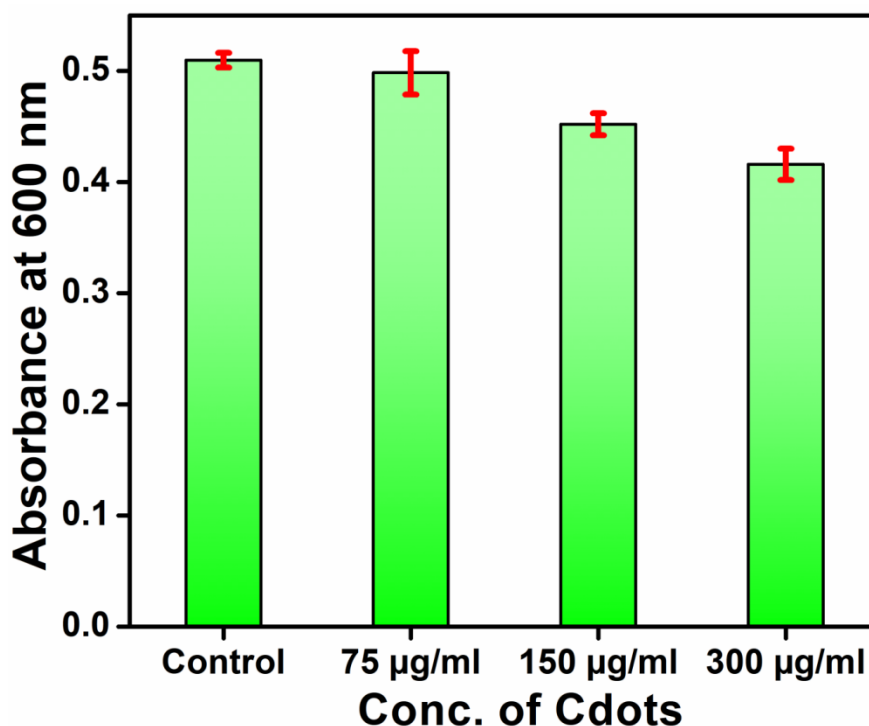

**Figure S1:** Antibacterial activity of the control Cdots (without doping) for Gram-negative bacteria with various concentrations of Cdots (0.5MIC, MIC, and 2MIC dose of Zn-Cdots). Control Cdots did not show prominent antibacterial activity like Zn-Cdots.
